# Supplementary material for: Unexpected dual orbital effects in radical addition reactions involving acyl, silyl and related radicals
Source: Royal Society of Chemistry journal article supplement (doi:10.1039/b515330a), 2006-01-01
Supplement: b515330a-esi.pdf [file b515330a-esi.pdf]

## Supplementary Material

### Unexpected dual orbital effects in radical addition reactions involving acyl, silyl and related radicals

Carl H Schiesser,<sup>\*a,b</sup> Hiroshi Matsubara,<sup>\*c</sup> Ina Ritsner<sup>a</sup> and Uta Wille<sup>\*a,b</sup>

<sup>a</sup> School of Chemistry, The University of Melbourne, Victoria, Australia, 3010

<sup>b</sup> Bio21 Molecular Science and Biotechnology Institute, The University of Melbourne, Victoria, Australia, 3010. Fax: 61 3 9347 8189; Tel: 61 3 8344 2432; E-mail: carlhs@unimelb.edu.au, uwille@unimelb.edu.au

<sup>c</sup> Department of Chemistry, Graduate School of Science, Osaka Prefecture University, Sakai, Osaka 599-8531, Japan. Fax: 81 72 254 9931; Tel: 81 72 254 9720; E-mail: matsu@c.s.osakafu-u.ac.jp

**Ab Initio and DFT Calculations.** Ab initio molecular orbital and DFT calculations were carried out on Dell PowerEdge 400SC and DACS XJ-3000 computers with the Gaussian 98<sup>1</sup> and the Gaussian 03<sup>2</sup> programs using standard computational methods<sup>3</sup> and basis sets. NBO<sup>4</sup> calculations were performed on Dell PowerEdge 400SC computers using the Gaussian 03 program. Geometries were optimised to saddle points or minima using standard gradient minimization techniques. Further single-point calculations were carried out using ROMP2, QCISD and CCSD(T) methods.

#### References

- 1 Gaussian 98, Revision A.9, M. J. Frisch, G. W. Trucks, H. B. Schlegel, G. E. Scuseria, M. A. Robb, J. R. Cheeseman, V. G. Zakrzewski, J. A. Montgomery, Jr., R. E. Stratmann, J. C. Burant, S. Dapprich, J. M. Millam, A. D. Daniels, K. N. Kudin, M. C. Strain, O. Farkas, J. Tomasi, V. Barone, M. Cossi, R. Cammi, B. Mennucci, C. Pomelli, C. Adamo, S. Clifford, J. Ochterski, G. A. Petersson, P. Y. Ayala, Q. Cui, K. Morokuma, D. K. Malick, A. D. Rabuck, K. Raghavachari, J. B. Foresman, J. Cioslowski, J. V. Ortiz, A. G. Baboul, B. B. Stefanov, G. Liu, A. Liashenko, P. Piskorz, I. Komaromi, R. Gomperts, R. L. Martin, D. J. Fox, T. Keith, M. A. Al-Laham, C. Y. Peng, A. Nanayakkara, M. Challacombe, P. M. W. Gill, B. Johnson, W. Chen, M. W. Wong, J. L. Andres, C. Gonzalez, M. Head-Gordon, E. S. Replogle, and J. A. Pople, Gaussian, Inc., Pittsburgh PA, 1998.
- 2 Gaussian 03, Revision B.04, M. J. Frisch, G. W. Trucks, H. B. Schlegel, G. E. Scuseria, M. A. Robb, J. R. Cheeseman, J. A. Montgomery, Jr., T. Vreven, K. N. Kudin, J. C. Burant, J. M. Millam, S. S. Iyengar, J. Tomasi, V. Barone, B. Mennucci, M. Cossi, G. Scalmani, N. Rega, G. A. Petersson, H. Nakatsuji, M. Hada, M. Ehara, K. Toyota, R. Fukuda, J. Hasegawa, M. Ishida, T. Nakajima, Y. Honda, O. Kitao, H. Nakai, M. Klene, X. Li, J. E. Knox, H. P. Hratchian, J. B. Cross, C. Adamo, J. Jaramillo, R. Gomperts, R. E. Stratmann, O. Yazyev, A. J. Austin, R. Cammi, C. Pomelli, J. W. Ochterski, P. Y. Ayala, K. Morokuma, G. A. Voth, P. Salvador, J. J. Dannenberg, V. G. Zakrzewski, S. Dapprich, A. D. Daniels, M. C. Strain, O. Farkas, D. K. Malick, A. D. Rabuck, K. Raghavachari, J. B. Foresman, J. V. Ortiz, Q. Cui, A. G. Baboul, S. Clifford, J. Cioslowski, B. B. Stefanov, G. Liu, A. Liashenko, P. Piskorz, I. Komaromi, R. L. Martin, D. J. Fox, T. Keith, M. A. Al-Laham, C. Y. Peng, A. Nanayakkara, M. Challacombe, P. M. W. Gill, B. Johnson, W. Chen, M. W. Wong, C. Gonzalez, and J. A. Pople, Gaussian, Inc., Pittsburgh PA, 2003.
- 3 W. J. Hehre, L. Radom, P. v. R. Schleyer and P. A. Pople, *Ab Initio Molecular Orbital Theory*, Wiley, New York, 1986.
- 4 NBO Version 3.1, E. D. Glendening, A. E. Reed, J. E. Carpenter, and F. Weinhold.

**Table S1** Calculated energy barriers<sup>a</sup> ( $\Delta E_1^\ddagger$ ,  $\Delta E_2^\ddagger$ , Scheme 1) and transition state (imaginary) frequencies<sup>b</sup> for the reaction of acetyl radical with methanimine at various levels of theory.

| Method                                   | $\Delta E_1^\ddagger$ | $\Delta E_1^\ddagger + \text{ZPE}$ | $\nu_1$ | $\Delta E_2^\ddagger$ | $\Delta E_1^\ddagger + \text{ZPE}$ | $\nu_2$ |
|------------------------------------------|-----------------------|------------------------------------|---------|-----------------------|------------------------------------|---------|
| UHF/6-311G**                             | 56.8                  | 58.8                               | 594i    | 37.7                  | 41.0                               | 449i    |
| MP2/6-311G**                             | 47.3                  | 60.9                               | 686i    | 54.0                  | 61.9                               | 516i    |
| MP2/cc-pVDZ                              | 48.0                  | 61.8                               | 731i    | 54.3                  | 62.4                               | 534i    |
| MP2/aug-cc-pVDZ                          | 33.0                  | 47.7                               | 574i    | 48.0                  | 55.8                               | 496i    |
| BHLYP/6-311G**                           | 22.6                  | 29.0                               | 550i    | 19.5                  | 24.4                               | 350i    |
| BHLYP/cc-pVDZ                            | 20.4                  | 27.0                               | 547i    | 17.1                  | 22.4                               | 361i    |
| B3LYP/6-311G**                           | 7.6                   | 13.3                               | 344i    | 11.8                  | 17.0                               | 274i    |
| B3LYP/cc-pVDZ                            | 4.9                   | 10.5                               | 342i    | 8.3                   | 14.1                               | 289i    |
| ROMP2/cc-pVDZ //<br>BHLYP/cc-pVDZ        | 28.8                  |                                    |         | 18.3                  |                                    |         |
| QCISD/6-311G**//<br>MP2/6-311G**         | 40.1                  |                                    |         | 30.6                  |                                    |         |
| QCISD/cc-pVDZ//<br>MP2/cc-pVDZ           | 39.8                  |                                    |         | 30.4                  |                                    |         |
| QCISD/cc-pVDZ//<br>BHLYP/cc-pVDZ         | 33.0                  |                                    |         | 26.1                  |                                    |         |
| QCISD/aug-cc-pVDZ//<br>MP2/aug-cc-pVDZ   | 28.8                  |                                    |         | 23.9                  |                                    |         |
| QCISD/cc-pVDZ//<br>B3LYP/cc-pVDZ         | 26.1                  |                                    |         | 26.0                  |                                    |         |
| CCSD(T)/6-311G**//<br>MP2/6-311G**       | 35.1                  |                                    |         | 27.3                  |                                    |         |
| CCSD(T)/cc-pVDZ//<br>MP2/cc-pVDZ         | 35.3                  |                                    |         | 27.0                  |                                    |         |
| CCSD(T)/aug-cc-pVDZ//<br>MP2/aug-cc-pVDZ | 23.0                  |                                    |         | 19.2                  |                                    |         |
| CCSD(T)/cc-pVDZ//<br>BHLYP/cc-pVDZ       | 27.2                  |                                    |         | 21.9                  |                                    |         |
| CCSD(T)/cc-pVDZ//<br>B3LYP/cc-pVDZ       | 22.0                  |                                    |         | 22.1                  |                                    |         |

<sup>a</sup>Energies in kJ mol<sup>-1</sup>. <sup>b</sup>Frequencies in cm<sup>-1</sup>.

# Gaussian Archive entries for optimised transition states.

## Reaction of acetyl radical with methanimine: Transition state 3

### UHF/6-311G\*\*

```

I\GINC-G98\FTS\UHF\6-311G(d,p)\C3H6N1O1(2)\MATSUMI6-May-2005\HF/6-311G** SCF=DIRECT
OPT=(TS,EF,READFC,MAXCYCLE=100) NOSYMM FREQ=NORAMAN GEOM=CHECK GUESS=READ\TS for addition to nitrogen of imine\0,2\CO,1,r2\C,1,r3,2,a3\N,1,r4,2,a4,3,d4,0\C,4,r5,1,a5,2,d5,0\H,3,r6,1,a6,2,d6,0\H,3,r7,1,a7,2,d7,0\H,3,r8,1,a8,2,d8,0\H,4,r9,1,a9,2,d9,0\H,5,r10,4,a10,1,d10,0\H,5,r11,4,a11,1,d11,0\r2=1.16272448\r3=1.50432095\r3=129.35241614\r4=1.99107933\r4=117.48896019\r4=153.86937645\r5=1.31934244\r5=112.69565994\r5=14.42361853\r6=1.08413671\r6=110.19837904\r6=226.44436699\r7=1.08325131\r7=107.91942949\r7=108.53710982\r8=1.08381492\r8=110.01783225\r8=348.17875565\r9=1.00418539\r9=100.15008563\r9=132.3898663\r10=1.07922969\r10=123.0037858\r10=104.24523152\r11=1.07556706\r11=118.44416796\r11=-69.30563997\Version=x86-Linux-G98Rev A.9\HF=-246.3744199\S2=1.005119\S2-1=0.\S2A=0.760217\RMSD=8.240e-09\RMSF=2.739e-06\Dipole=-0.1029741,0.3512542,-0.9306971\PG=C01 [X(C3H6N1O1)]\@

```

### MP2/6-311G\*\*

```

I\CHEMISTRY CLUSTER KIRKLAND-KNET5\FTS\UMP2-FC\6-311G(d,p)\C3H6N1O1(2)\HIROSHI\6-May-2005\MP2/6-311G** SCF=DIRECT OPT=(TS,EF,CALCHFFC,MAXCYCLE=100) NOSYMM FREQ=NORAMAN\TS for addition to nitrogen of imine\0,2\CO,1,r2\C,1,r3,2,a3\N,1,r4,2,a4,3,d4,0\C,4,r5,1,a5,2,d5,0\H,3,r6,1,a6,2,d6,0\H,3,r7,1,a7,2,d7,0\H,3,r8,1,a8,2,d8,0\H,4,r9,1,a9,2,d9,0\H,5,r10,4,a10,1,d10,0\H,5,r11,4,a11,1,d11,0\r2=1.2223954\r3=1.51801246\r3=124.65042078\r4=1.76588121\r4=109.24841904\r4=124.33673948\r5=1.25097908\r5=116.47411713\r5=7.63510449\r6=1.0927799\r6=111.71725127\r6=173.79797951\r7=1.09886014\r7=110.64005704\r7=51.47921365\r8=1.09269408\r8=107.9458183\r8=293.3479316\r9=1.0179727\r9=124.02108618\r9=173.41276736\r10=1.0881745\r10=123.70838963\r10=167.50178173\r11=1.09199551\r11=115.54893759\r11=-10.92919791\Version=x86-Linux-G03Rev B.04\HF=-246.3672269\MP2=-247.1570942\PUHF=-246.3750591\PMP2-0=-247.1635975\S2=0.831467\S2-1=0.803382\S2A=0.752174\RMSD=3.031e-09\RMSF=9.917e-05\Dipole=-0.8269389,-1.3467298,-1.0521902\PG=C01 [X(C3H6N1O1)]\@

```

### MP2/cc-pVDZ

```

I\CHEMISTRY CLUSTER KIRKLAND-KNET9\FTS\UMP2-FC\CC-pVDZ\C3H6N1O1(2)\HIROSHI\16-May-2005\MP2/CC-PVDZ SCF=DIRECT OPT=(TS,EF,CALCHFFC,MAXCYCLE=100) NOSYMM FREQ=NORAMAN\TS for addition to nitrogen of imine\0,2\CO,1,r2\C,1,r3,2,a3\N,1,r4,2,a4,3,d4,0\C,4,r5,1,a5,2,d5,0\H,3,r6,1,a6,2,d6,0\H,3,r7,1,a7,2,d7,0\H,3,r8,1,a8,2,d8,0\H,4,r9,1,a9,2,d9,0\H,5,r10,4,a10,1,d10,0\H,5,r11,4,a11,1,d11,0\r2=1.22971492\r3=1.52184069\r3=124.9559357\r4=1.76251887\r4=109.43277767\r4=124.75672785\r5=1.25699425\r5=116.26457421\r5=8.17009989\r6=1.10188821\r6=111.79419295\r6=174.18269192\r7=1.10794769\r7=111.14775309\r7=51.67010068\r8=1.10177322\r8=108.05235965\r8=293.54129655\r9=1.02473851\r9=124.54114912\r9=173.960543\r10=1.09728868\r10=123.6325648\r10=167.6826281\r11=1.10153407\r11=115.29463436\r11=-10.83965775\Version=x86-Linux-G03Rev B.04\HF=-246.3225359\MP2=-247.0681638\PUHF=-246.3309082\PMP2-0=-247.0751458\S2=0.838922\S2-1=0.808896\S2A=0.752494\RMSD=4.402e-09\RMSF=6.043e-06\Dipole=-0.8266819,-1.3138347,-1.0366035\PG=C01 [X(C3H6N1O1)]\@

```

### MP2/aug-cc-pVDZ

```

I\CHEMISTRY CLUSTER KIRKLAND-KNET7\FTS\UMP2-FC\Aug-CC-pVDZ\C3H6N1O1(2)\HIROSHI\16-May-2005\MP2/AUG-CC-PVDZ SCF=DIRECT OPT=(TS,EF,READFC,MAXCYCLE=100) NOSYMM FREQ=NORAMAN GEOM=CHECK GUESS=READ\TS for addition to nitrogen of imine\0,2\CO,1,r2\C,1,r3,2,a3\N,1,r4,2,a4,3,d4,0\C,4,r5,1,a5,2,d5,0\H,3,r6,1,a6,2,d6,0\H,3,r7,1,a7,2,d7,0\H,3,r8,1,a8,2,d8,0\H,4,r9,1,a9,2,d9,0\H,5,r10,4,a10,1,d10,0\H,5,r11,4,a11,1,d11,0\r2=1.23679937\r3=1.51894309\r3=124.89704457\r4=1.77683678\r4=108.42803376\r4=123.31952185\r5=1.25834625\r5=116.04294613\r5=5.75600067\r6=1.10068733\r6=111.45382641\r6=173.63806259\r7=1.10705157\r7=110.77987548\r7=51.35716318\r8=1.10021673\r8=107.9569032\r8=292.86390341\r9=1.02269959\r9=124.9339869\r9=176.0706696\r10=1.09520218\r10=123.1823142\r10=171.5444368\r11=1.10039664\r11=115.57928113\r11=-7.43791851\Version=x86-Linux-G03Rev B.04\HF=-246.3397303\MP2=-247.1254475\PUHF=-246.3465024\PMP2-0=-247.1310173\S2=0.8

```

17756\S2-1=0.793319\S2A=0.751791\RMSD=7.296e-09\RMSF=6.016e-05\Dipole=-0.7652205,-1.4812522,-1.1019471\PG=C01 [X(C3H6N1O1)]\@

**QCISD/6-311G\*\*/MP2/6-311G\*\***

QCISD=-247.2056287

**QCISD/cc-pVDZ//MP2/cc-pVDZ**

QCISD=-247.1227516

**QCISD/aug-cc-pVDZ//MP2/aug-cc-pVDZ**

QCISD=-247.1761025

**CCSD(T)/6-311G\*\*/MP2/6-311G\*\***

CCSD(T)=-247.235539

**CCSD(T)/cc-pVDZ//MP2/cc-pVDZ**

CCSD(T)=-247.1475336

**CCSD(T)/aug-cc-pVDZ//MP2/aug-cc-pVDZ**

CCSD(T)=-247.2058905

**BHLYP/6-311G\*\***

1\N\GINC-G98\FTS\UBHandHLYP\6-311G(d,p)\C3H6N1O1(2)\MATSU\16-May-2005\1\#BHANDHLYP/6-311G\*\* SCF=DIRECT OPT=(TS,EF,READFC,MAXCYCLE=100) NOSYMM FREQ=NORAMAN GEOM=CHECK GUESS=READ\TS for addition to nitrogen of imine\0,2\C\O,1,r2\C,1,r3,2,a3\N,1,r4,2,a4,3,d4,0\C,4,r5,1,a5,2,d5,0\H,3,r6,1,a6,2,d6,0\H,3,r7,1,a7,2,d7,0\H,3,r8,1,a8,2,d8,0\H,4,r9,1,a9,2,d9,0\H,5,r10,4,a10,1,d10,0\H,5,r11,4,a11,1,d11,0\vr2=1.1844393\vr3=1.50279658\vr4=1.93996518\vr5=110.16492649\vr6=128.7314157\vr7=1.26866426\vr8=117.11005553\vr9=14.98049108\vr10=1.08223045\vr11=111.7176096\vr12=171.03646425\vr13=1.0877186\vr14=110.38991611\vr15=48.69630087\vr16=1.08543862\vr17=107.48414852\vr18=290.74427244\vr19=1.00990387\vr20=117.25080126\vr21=157.155385\vr22=1.08149978\vr23=123.55255094\vr24=144.16868789\vr25=1.08015449\vr26=117.77956861\vr27=33.0204734\vr28=Version=x86-Linux-G98RevA.9\HF=-247.7194693\S2=0.776396\S2-1=0.\S2A=0.750226\RMSD=4.459e-09\RMSF=1.169e-05\Dipole=-0.5810431,-0.6194415,-1.0641071\PG=C01 [X(C3H6N1O1)]\@

**BHLYP/cc-pVDZ**

1\N\GINC-G98\FTS\UBHandHLYP\CC-pVDZ\C3H6N1O1(2)\MATSU\16-May-2005\1\#BHANDHLYP/C-pVDZ SCF=DIRECT OPT=(TS,EF,READFC,MAXCYCLE=100) NOSYMM FREQ=NORAMAN GEOM=CHECK GUESS=READ\TS for addition to imine\0,2\C\O,1,r2\C,1,r3,2,a3\N,1,r4,2,a4,3,d4,0\C,4,r5,1,a5,2,d5,0\H,3,r6,1,a6,2,d6,0\H,3,r7,1,a7,2,d7,0\H,3,r8,1,a8,2,d8,0\H,4,r9,1,a9,2,d9,0\H,5,r10,4,a10,1,d10,0\H,5,r11,4,a11,1,d11,0\vr2=1.19127853\vr3=1.50416665\vr4=126.97283901\vr5=1.93519003\vr6=109.75647156\vr7=127.70590358\vr8=1.27203886\vr9=116.70844848\vr10=15.36874282\vr11=1.09345373\vr12=107.4686894\vr13=289.38637301\vr14=1.09037183\vr15=111.74687048\vr16=169.86581515\vr17=1.09603528\vr18=110.68748987\vr19=407.2242523\vr20=1.01615576\vr21=118.91610565\vr22=158.93726369\vr23=1.08991785\vr24=123.63343936\vr25=146.47460454\vr26=1.08914759\vr27=117.42996251\vr28=30.65487056\vr29=Version=x86-Linux-G98RevA.9\HF=-247.6661375\S2=0.775656\S2-1=0.\S2A=0.750224\RMSD=4.693e-09\RMSF=9.872e-06\Dipole=-0.5659577,-0.6651366,-1.0456173\PG=C01 [X(C3H6N1O1)]\@

**QCISD/cc-pVDZ//BHLYP/cc-pVDZ**

QCISD=-247.1230743

**CCSD(T)/cc-pVDZ//BHLYP/cc-pVDZ**

CCSD(T)=-247.1476174

**B3LYP/6-311G\*\***

1\N\GINC-G98\FTS\UB3LYP\6-311G(d,p)\C3H6N1O1(2)\MATSU\16-May-2005\1\#B3LYP/6-311G\*\* SCF=DIRECT OPT=(TS,EF,READFC,MAXCYCLE=100) NOSYMM FREQ=NORAMAN GEOM=CHECK GU

ESS=READ\TS for addition to nitrogen of imine\0,2\C\O,1,r2\C,1,r3,2,a3\N,1,r4,2,a4,3,d4,0\C,4,r5,1,a5,2,d5,0\H,3,r6,1,a6,2,d6,0\H,3,r7,1,a7,2,d7,0\H,3,r8,1,a8,2,d8,0\H,4,r9,1,a9,2,d9,0\H,5,r10,4,a10,1,d10,0\H,5,r11,4,a11,1,d11,0\|r2=1.18973994|r3=1.5116179|a3=127.67460073|r4=2.0803567|a4=110.43615511\d4=128.70045169|r5=1.2798418|a5=117.91678051\d5=13.75418639|r6=1.09364249|a6=107.53092293\d6=287.40162858|r7=1.08869372|a7=111.50597494\d7=167.63532352|r8=1.09557007|a8=110.29972834\d8=405.36471708|r9=1.02069864|a9=113.7761805\d9=150.19934603|r10=1.09112958|a10=124.07147074\d10=137.10635428|r11=1.08849519|a11=118.15506106\d11=-40.10550414\|Version=x86-Linux-G98RevA.9\HF=-247.8820617\S2=0.758692\S2-1=0.\S2A=0.750032\RMSD=5.279e-09\RMSF=1.214e-05\Dipole=-0.4109617,-0.4071988,-0.9226147\PG=C01 [X(C3H6N1O1)]\|@

### B3LYP/cc-pVDZ

1\|GINC-G98\FTS\UB3LYP\CC-pVDZ\C3H6N1O1(2)\MATSU\16-May-2005\1\|#B3LYP/CC-PVDZ SCF=DIRECT OPT=(TS,EF,READFC,MAXCYCLE=100) NOSYMM FREQ=NORAMAN GEOM=CHECK GUESS=READ\TS for addition to imine\0,2\C\O,1,r2\C,1,r3,2,a3\N,1,r4,2,a4,3,d4,0\C,4,r5,1,a5,2,d5,0\H,3,r6,1,a6,2,d6,0\H,3,r7,1,a7,2,d7,0\H,3,r8,1,a8,2,d8,0\H,4,r9,1,a9,2,d9,0\H,5,r10,4,a10,1,d10,0\H,5,r11,4,a11,1,d11,0\|r2=1.19668012|r3=1.51356917|a3=127.55944593|r4=2.08453949|a4=109.87730008\d4=127.15983772|r5=1.2833721|a5=117.48123346\d5=14.41259712|r6=1.10249035|a6=107.50731768\d6=285.14526269|r7=1.09762508|a7=111.51758936\d7=165.62066784|r8=1.10471357|a8=110.62583126\d8=403.00702596|r9=1.02780598|a9=115.73652791\d9=152.06678391|r10=1.100473|a10=124.27504587\d10=139.46790952|r11=1.0984021|a11=117.82488834\d11=-37.64533789\|Version=x86-Linux-G98RevA.9\HF=-247.8215383\S2=0.758256\S2-1=0.\S2A=0.75003\RMSD=7.682e-09\RMSF=1.108e-05\Dipole=-0.3851384,-0.4517884,-0.9030972\PG=C01 [X(C3H6N1O1)]\|@

### QCISD/cc-pVDZ//B3LYP/cc-pVDZ

QCISD=-247.127663

### CCSD(T)/cc-pVDZ//B3LYP/cc-pVDZ

CCSD(T)=-247.1519945

## Reaction of aetyl radical with methanimine: Transition state 4

### UHF/6-311G\*\*

1\|GINC-G98\FTS\UHF\6-311G(d,p)\C3H6N1O1(2)\MATSU\21-Apr-2005\1\|#HF/6-311G\*\* SCF=DIRECT GEOM=CHECK GUESS=READ FREQ=NORAMAN OPT=(TS,EF,READFC,MAXCYCLE=100) NOSYMM\TS for addition to carbon of imine\0,2\C\O,1,r2\C,1,r3,2,a3\C,1,r4,2,a4,3,d4,0\N,4,r5,1,a5,2,d5,0\H,3,r6,1,a6,2,d6,0\H,3,r7,1,a7,2,d7,0\H,3,r8,1,a8,2,d8,0\H,4,r9,1,a9,2,d9,0\H,4,r10,1,a10,2,d10,0\H,5,r11,4,a11,1,d11,0\|r2=1.16086706|r3=1.50202992|a3=129.976605|r4=2.14857906|a4=116.537753\d4=182.54516533|r5=1.31771026|a5=108.18126326\d5=-158.2737564|r6=1.08359169|a6=108.73195823\d6=120.50444169|r7=1.08377009|a7=110.20395608\d7=-1.01687656|r8=1.08350992|a8=108.86013393\d8=237.15810943|r9=1.0810922|a9=91.87496212\d9=-32.65546159|r10=1.0793839|a10=90.69020189\d10=-277.14307782|r11=1.00680931|a11=109.88209891\d11=91.23378278\|Version=x86-Linux-G98RevA.9\HF=-246.3816669\S2=0.973617\S2-1=0.\S2A=0.758323\RMSD=8.024e-09\RMSF=3.228e-06\Dipole=0.283181,-0.2944516,-0.2479698\PG=C01 [X(C3H6N1O1)]\|@

### MP2/6-311G\*\*

1\|GINC-G98\FTS\UMP2-FC\6-311G(d,p)\C3H6N1O1(2)\MATSU\22-Apr-2005\1\|#MP2/6-311G\*\* SCF=DIRECT GEOM=CHECK GUESS=READ FREQ=NUMER OPT=(TS,EF,READFC,MAXCYCLE=100) NOSYMM\TS for addition to carbon of imine\0,2\C\O,1,r2\C,1,r3,2,a3\C,1,r4,2,a4,3,d4,0\N,4,r5,1,a5,2,d5,0\H,3,r6,1,a6,2,d6,0\H,3,r7,1,a7,2,d7,0\H,3,r8,1,a8,2,d8,0\H,4,r9,1,a9,2,d9,0\H,4,r10,1,a10,2,d10,0\H,5,r11,4,a11,1,d11,0\|r2=1.18111003|r3=1.50309489|a3=131.45982414|r4=2.13166497|a4=119.75682218\d4=183.24013393|r5=1.28615354|a5=108.72405836\d5=-164.7029938|r6=1.09134511|a6=107.80016669\d6=124.91375618|r7=1.09237913|a7=110.84180913\d7=2.08803791|r8=1.0920527|a8=107.72389969\d8=239.59038066|r9=1.09572494|a9=90.26567782\d9=-37.360563|r10=1.09293047|a10=86.602305\d10=-282.98980874|r11=1.02114453|a11=108.69865576\d11=93.09572409\|Version=x86-Linux-G98RevA.9\HF=-246.3781894\MP2=-247.1545547\PUHF=-246.3956153\PM2-0=-247.169159\S2=0.942448\S2-1=0.878735\S2A=0.757242\RMSD=7.280e-09\RMSF=3.902e-06\Dipole=0.4975461,-0.2865186,0.234316\PG=C01 [X(C3H6N1O1)]\|@

**MP2/cc-pVDZ**

1\GINC-G98\FTS\UMP2-FC\CC-pVDZ\C3H6N1O1(2)\MATSU\22-Apr-2005\1\#MP2/CC-PVDZ SCF=DIRECT GEOM=CHECK GUESS=READ FREQ=NUMER OPT=(TS,EF,READFC,MAXCYCLE=100) NOSYMM\TS for addition to cabon of imine\0,2\C\O,1,r2\C,1,r3,2,a3\C,1,r4,2,a4,3,d4,0\N,4,r5,1,a5,2,d5,0\H,3,r6,1,a6,2,d6,0\H,3,r7,1,a7,2,d7,0\H,3,r8,1,a8,2,d8,0\H,4,r9,1,a9,2,d9,0\H,4,r10,1,a10,2,d10,0\H,5,r11,4,a11,1,d11,0\|r2=1.18796031|r3=1.50889422|a3=131.17762424|r4=2.13375184|a4=120.28137948|d4=177.4863356|r5=1.29396884|a5=107.3134783|d5=-143.77745646|r6=1.09905647|a6=108.12726708|d6=140.62887079|r7=1.10111587|a7=110.96968319|d7=16.0442122|r8=1.10313367|a8=106.93560766|d8=256.00967193|r9=1.10458184|a9=89.95923733|d9=-16.63015596|r10=1.10247197|a10=88.58573889|d10=-262.40964056|r11=1.02997278|a11=108.22471889|d11=91.21777926\|Version=x86-Linux-G98RevA.9\HF=-246.3335915\MP2=-247.0657758\PUHF=-246.3513684\PMP2-0=-247.0807275\S2=0.949974\S2-1=0.884926\S2A=0.757877\RMSD=5.994e-09\RMSF=5.729e-06\Dipole=0.4588585,0.0458281,0.2505477\PG=C01 [X(C3H6N1O1)]\|@

**MP2/aug-cc-pVDZ**

1\GINC-G98\FTS\UMP2-FC\Aug-CC-pVDZ\C3H6N1O1(2)\MATSU\23-Apr-2005\1\#MP2/AUG-CC-PVDZ SCF=DIRECT GEOM=CHECK GUESS=READ FREQ=NUMER OPT=(TS,EF,READFC,MAXCYCLE=100) NOSYMM\TS for addition to cabon of imine\0,2\C\O,1,r2\C,1,r3,2,a3\C,1,r4,2,a4,3,d4,0\N,4,r5,1,a5,2,d5,0\H,3,r6,1,a6,2,d6,0\H,3,r7,1,a7,2,d7,0\H,3,r8,1,a8,2,d8,0\H,4,r9,1,a9,2,d9,0\H,4,r10,1,a10,2,d10,0\H,5,r11,4,a11,1,d11,0\|r2=1.19183019|r3=1.50489801|a3=131.67387934|r4=2.134144|a4=119.05566832|d4=182.94596047|r5=1.29363532|a5=108.96860819|d5=-174.55922877|r6=1.10057515|a6=107.23755289|d6=116.77443322|r7=1.09967308|a7=110.91031136|d7=-5.05206995|r8=1.099176|a8=107.80443064|d8=231.28541428|r9=1.10258593|a9=89.85371916|d9=-47.75246704|r10=1.09961704|a10=86.36123532|d10=-292.8044455|r11=1.02649239|a11=109.74458103|d11=93.09654793\|Version=x86-Linux-G98RevA.9\HF=-246.3506427\MP2=-247.1197374\PUHF=-246.3679952\PMP2-0=-247.1342893\S2=0.943345\S2-1=0.879465\S2A=0.757678\RMSD=5.877e-09\RMSF=1.575e-06\Dipole=0.5743364,-0.4223146,0.1463729\PG=C01 [X(C3H6N1O1)]\|@

**QCISD/6-311G\*\*//MP2/6-311G\*\***

QCISD=-247.209226

**QCISD/cc-pVDZ//MP2/cc-pVDZ**

QCISD=-247.1263378

**QCISD/aug-cc-pVDZ//MP2/aug-cc-pVDZ**

QCISD=-247.1779781

**CCSD(T)/6-311G\*\*//MP2/6-311G\*\***

CCSD(T)=-247.23850

**CCSD(T)/cc-pVDZ//MP2/cc-pVDZ**

CCSD(T)=-247.1506932

**CCSD(T)/aug-cc-pVDZ//MP2/aug-cc-pVDZ**

CCSD(T)=-247.2073063

**BHLYP/6-311G\*\***

1\GINC-G98\FTS\UBHandHLYP\6-311G(d,p)\C3H6N1O1(2)\MATSU\21-Apr-2005\1\#BHANDHLYP/6-311G\*\* SCF=DIRECT GEOM=CHECK GUESS=READ FREQ=NORAMAN OPT=(TS,EF,READFC,MAXCYCLE=100) NOSYMM\TS for addition to cabon of imine\0,2\C\O,1,r2\C,1,r3,2,a3\C,1,r4,2,a4,3,d4,0\N,4,r5,1,a5,2,d5,0\H,3,r6,1,a6,2,d6,0\H,3,r7,1,a7,2,d7,0\H,3,r8,1,a8,2,d8,0\H,4,r9,1,a9,2,d9,0\H,4,r10,1,a10,2,d10,0\H,5,r11,4,a11,1,d11,0\|r2=1.16570981|r3=1.49058539|a3=131.17169585|r4=2.1800781|a4=118.16678356|d4=183.77220328|r5=1.2939813|a5=108.51084118|d5=-174.24055356|r6=1.08571215|a6=107.84729545|d6=113.23532703|r7=1.0846204|a7=110.84490113|d7=-7.75792777|r8=1.08331455|a8=108.82569282|d8=228.72363381|r9=1.08567909|a9=91.02361607|d9=-47.47867371|r10=1.08256335|a10=86.9906222|d10=-292.59509488|r11=1.0123742|a11=110.06381241|d11=93.29174639\|Version=x86-Linux-G98RevA.9\HF=-247.7206422\S2

=0.804131\S2-1=0.\S2A=0.750461\RMSD=3.925e-09\RMSF=7.974e-06\Dipole=0.462098,-0.4630837,-0.0975713\PG=C01 [X(C3H6N1O1)]\@

### BHLYP/cc-pVDZ

1\GINC-G98\FTS\UBHandHLYP\CC-pVDZ\C3H6N1O1(2)\MATSU\21-Apr-2005\1\#BHANDHLYP/CC-PVDZ SCF=DIRECT GEOM=CHECK GUESS=READ FREQ=NORAMAN OPT=(TS,EF,READFC,MAXCYCLE=100) NOSYMM\TS for addition to cabon of imine\0,2\C\O,1,r2\C,1,r3,2,a3\C,1,r4,2,a4,3,d4,0\N,4,r5,1,a5,2,d5,0\H,3,r6,1,a6,2,d6,0\H,3,r7,1,a7,2,d7,0\H,3,r8,1,a8,2,d8,0\H,4,r9,1,a9,2,d9,0\H,4,r10,1,a10,2,d10,0\H,5,r11,4,a11,1,d11,0\vr2=1.17158271\vr3=1.49315637\vr4=130.8299989\vr5=2.18738489\vr6=119.15398514\vr7=74.29940843\vr8=1.29750226\vr9=106.24786847\vr10=-137.82066987\vr11=1.09069828\vr12=108.77224258\vr13=139.86368632\vr14=1.092665\vr15=110.88346651\vr16=15.75031607\vr17=1.09467112\vr18=107.48022484\vr19=255.83055369\vr20=1.09352969\vr21=90.06983068\vr22=-11.5860006\vr23=1.09186353\vr24=89.90263229\vr25=-256.62488074\vr26=1.01964757\vr27=109.45610198\vr28=90.62494756\Version=x86-Linux-G98RevA.9\HF=-247.6674124\S2=0.805596\S2-1=0.\S2A=0.75048\RMSD=7.735e-09\RMSF=1.683e-05\Dipole=0.3836943,0.0530261,-0.0032674\PG=C01 [X(C3H6N1O1)]\@

### QCISD/cc-pVDZ//BHLYP/cc-pVDZ

QCISD=-247.125692

### CCSD(T)/cc-pVDZ//BHLYP/cc-pVDZ

CCSD(T)-247.1496267

### B3LYP/6-311G\*\*

1\GINC-G98\FTS\UB3LYP\6-311G(d,p)\C3H6N1O1(2)\MATSU\22-Apr-2005\1\#B3LYP/6-311G\*\* SCF=DIRECT GEOM=CHECK GUESS=READ FREQ=NORAMAN OPT=(TS,EF,READFC,MAXCYCLE=100) NOSYMM\TS for addition to cabon of imine\0,2\C\O,1,r2\C,1,r3,2,a3\C,1,r4,2,a4,3,d4,0\N,4,r5,1,a5,2,d5,0\H,3,r6,1,a6,2,d6,0\H,3,r7,1,a7,2,d7,0\H,3,r8,1,a8,2,d8,0\H,4,r9,1,a9,2,d9,0\H,4,r10,1,a10,2,d10,0\H,5,r11,4,a11,1,d11,0\vr2=1.17820024\vr3=1.49786992\vr4=131.2341849\vr5=2.21032552\vr6=118.92590494\vr7=184.84783179\vr8=1.30308591\vr9=108.78987117\vr10=-179.77002595\vr11=1.09471765\vr12=107.42283609\vr13=104.2043824\vr14=1.0924779\vr15=111.08159203\vr16=-15.84991132\vr17=1.09074479\vr18=108.96020812\vr19=219.67780031\vr20=1.09516455\vr21=91.24335966\vr22=-52.34558962\vr23=1.09120544\vr24=86.24036358\vr25=-297.75464875\vr26=1.02315539\vr27=109.76072909\vr28=93.97160611\Version=x86-Linux-G98RevA.9\HF=-247.8804593\S2=0.768963\S2-1=0.\S2A=0.750077\RMSD=8.210e-09\RMSF=9.244e-06\Dipole=0.527476,-0.5270567,-0.0477872\PG=C01 [X(C3H6N1O1)]\@

### B3LYP/cc-pVDZ

1\GINC-G98\FTS\UB3LYP\CC-pVDZ\C3H6N1O1(2)\MATSU\22-Apr-2005\1\#B3LYP/CC-PVDZ SCF=DIRECT GEOM=CHECK GUESS=READ FREQ=NORAMAN OPT=(TS,EF,READFC,MAXCYCLE=100) NOSYMM\TS for addition to cabon of imine\0,2\C\O,1,r2\C,1,r3,2,a3\C,1,r4,2,a4,3,d4,0\N,4,r5,1,a5,2,d5,0\H,3,r6,1,a6,2,d6,0\H,3,r7,1,a7,2,d7,0\H,3,r8,1,a8,2,d8,0\H,4,r9,1,a9,2,d9,0\H,4,r10,1,a10,2,d10,0\H,5,r11,4,a11,1,d11,0\vr2=1.18479732\vr3=1.50135765\vr4=130.85739089\vr5=2.2214376\vr6=119.75075915\vr7=169.45946175\vr8=1.30652748\vr9=105.58347571\vr10=-133.09686503\vr11=1.09966078\vr12=108.44117548\vr13=140.65928421\vr14=1.10144641\vr15=111.22067272\vr16=16.37253661\vr17=1.10348959\vr18=107.48744057\vr19=256.47614076\vr20=1.0359478\vr21=90.23711895\vr22=-6.3759065\vr23=1.10114657\vr24=89.96206115\vr25=-251.66784345\vr26=1.03108807\vr27=109.15349827\vr28=90.58972576\Version=x86-Linux-G98RevA.9\HF=-247.8202464\S2=0.769184\S2-1=0.\S2A=0.750077\RMSD=2.437e-09\RMSF=3.724e-05\Dipole=0.4137521,0.1267083,0.0556882\PG=C01 [X(C3H6N1O1)]\@

### QCISD/cc-pVDZ//B3LYP/cc-pVDZ

QCISD=-247.1277132

### CCSD(T)/cc-pVDZ//B3LYP/cc-pVDZ

CCSD(T)=-247.1519435

## Reaction of silyl radical with formaldehyde: Transition state 6

### BHandHLYP/6-311G\*\*

1\ \ CHEMISTRY CLUSTER KIRKLAND-KNET13\FTS\SUBHandHLYP\6-311G(d,p)\C1H5O1Si1(2)\UWIL  
LE\16-Mar-2005\1\#\BHANDHLYP\6-311G\*\* SCF=(QC,DIRECT) OPT=(TS,EF,Z-MATRIX,READFC,  
MAXCYCLE=100) GEOM=CHECKPOINT GUESS=CHECK\ \Formaldehyde - SiH3 Transition state\0,2\C  
O,1,r1\Si,2,r2,1,a1\H,1,r3,2,a2,3,d1,0\H,1,r4,2,a3,3,d2,0\H,3,r5,2,a4,1,d3,0\H,3,r6,2,a5,1,d4,0\H,3,r7,2,a6,1,d5,  
0\ r1=1.22449131\ r2=2.19687836\ r3=1.08959798\ r4=1.08829226\ r5=1.49133414\ r6=1.47041939\ r7=1.477371  
3\ a1=131.45196005\ a2=121.35540054\ a3=120.59892903\ a4=143.92115007\ a5=89.8356462\ a6=92.45872785\  
d1=311.93725674\ d2=128.93374265\ d3=78.0393882\ d4=158.46425313\ d5=47.17342113\ \Version=x86-Linu  
x-G03RevB.04\State=2-A\HF=-405.6922289\ S2=0.775453\ S2-1=0.\ S2A=0.750105\ RMSD=2.222e-09\ RMSF  
=2.916e-05\ Dipole=-0.1792275,-0.0932345,-1.06404\ PG=C01 [X(C1H5O1Si1)]\ \@

### BHandHLYP/cc-pVDZ

1\ \ CHEMISTRY CLUSTER KIRKLAND-KNET13\FTS\SUBHandHLYP\CC-pVDZ\C1H5O1Si1(2)\UWIL  
LE\08-Mar-2005\1\#\BHANDHLYP\CC-PVDZ SCF=TIGHT OPT=(TS,EF,Z-MATRIX,CALCFC,MAX  
CYCLE=100)\ \Formaldehyde - SiH3 Transition state\0,2\C\O,1,r1\Si,2,r2,1,a1\H,1,r3,2,a2,3,d1,0\H,1,r4,2,a3,  
3,d2,0\H,3,r5,2,a4,1,d3,0\H,3,r6,2,a5,1,d4,0\H,3,r7,2,a6,1,d5,0\ r1=1.22811791\ r2=2.19489244\ r3=1.0983957r  
4=1.0972914\ r5=1.50356368\ r6=1.48127531\ r7=1.48818521\ a1=131.06075366\ a2=121.4590529\ a3=120.5479  
2987\ a4=144.5535309\ a5=89.60361276\ a6=92.4062282\ d1=312.64859203\ d2=129.47099304\ d3=-77.7715630  
9\ d4=158.84216521\ d5=47.83616056\ \Version=x86-Linux-G03RevB.04\State=2-A\HF=-405.6576697\ S2=0.7  
76468\ S2-1=0.\ S2A=0.750116\ RMSD=3.694e-09\ RMSF=3.628e-05\ Dipole=-0.2093609,-0.0598939,-1.02811  
25\ PG=C01 [X(C1H5O1Si1)]\ \@

### BHandHLYP/aug-cc-pVDZ

1\ \ CHEMISTRY CLUSTER KIRKLAND-KNET18\FTS\UBHandHLYP\Aug-CC-pVDZ\C1H5O1Si1(2)\U  
WILLE\08-Mar-2005\1\#\BHANDHLYP\AUG-CC-PVDZ SCF=(QC,DIRECT) OPT=(TS,EF,Z-MATRIX,  
READFC,MAXCYCLE=100) GEOM=CHECKPOINT GUESS=CHECK\ \Formaldehyde - SiH3 Transition  
state\0,2\C\O,1,r1\Si,2,r2,1,a1\H,1,r3,2,a2,3,d1,0\H,1,r4,2,a3,3,d2,0\H,3,r5,2,a4,1,d3,0\H,3,r6,2,a5,1,d4,0\H,3,r  
7,2,a6,1,d5,0\ r1=1.22778762\ r2=2.23246792\ r3=1.09526315\ r4=1.09403069\ r5=1.4999964\ r6=1.47983749\ r7  
=1.48644197\ a1=129.67280131\ a2=121.11706839\ a3=120.65579935\ a4=143.44128023\ a5=89.94649093\ a6=9  
1.9929288\ d1=310.52833578\ d2=127.62308413\ d3=-80.24634185\ d4=155.89286304\ d5=44.49605746\ \ Versi  
on=x86-Linux-G03RevB.04\State=2-A\HF=-405.6677824\ S2=0.775678\ S2-1=0.\ S2A=0.750121\ RMSD=0.00  
e+00\ RMSF=1.866e-05\ Dipole=-0.1795944,-0.0514929,-0.9962081\ PG=C01 [X(C1H5O1Si1)]\ \@

### BHandHLYP/cc-pVTZ

1\ \ CHEMISTRY CLUSTER KIRKLAND-KNET13\FTS\UBHandHLYP\CC-pVTZ\C1H5O1Si1(2)\UWIL  
LE\09-Mar-2005\1\#\BHANDHLYP\CC-PVTZ SCF=VERYTIGHT OPT=(TS,EF,Z-MATRIX,READFC,  
MAXCYCLE=100) GEOM=CHECKPOINT GUESS=CHECK\ \Formaldehyde - SiH3 Transition state\0,2\C\O,1,r1\Si,2,r2,1,a1\H,1,r3,2,a2,3,d1,0\H,1,r4,2,a3,3,d2,0\H,3,r5,2,a4,1,d3,0\H,3,r6,2,a5,1,d4,0\H,3,r7,2,a  
6,1,d5,0\ r1=1.21929696\ r2=2.19118659\ r3=1.08750037\ r4=1.08630006\ r5=1.49299888\ r6=1.47045682\ r7=1.  
47750415\ a1=130.14255819\ a2=121.25575014\ a3=120.65064199\ a4=147.68038049\ a5=88.67529329\ a6=90.5  
0738652\ d1=316.99150399\ d2=134.18208636\ d3=-81.65949726\ d4=154.35954432\ d5=42.96690953\ \Versio  
n=x86-Linux-G03RevB.04\State=2-A\HF=-405.7111652\ S2=0.772914\ S2-1=0.\ S2A=0.750109\ RMSD=9.26  
8e-09\ RMSF=1.725e-05\ Dipole=-0.2736079,-0.0516992,-1.1020217\ PG=C01 [X(C1H5O1Si1)]\ \@

## Reaction of silyl radical with methanimine: Transition state 9

### BHandHLYP/6-311G\*\*

1\ \ CHEMISTRY CLUSTER KIRKLAND-KNET13\FTS\UBHandHLYP\6-311G(d,p)\C1H6N1Si1(2)\UWIL  
LE\30-Mar-2005\1\#\BHANDHLYP\6-311G\*\* SCF=(QC,DIRECT) OPT=(TS,EF,Z-MATRIX,READFC,  
MAXCYCLE=100) GEOM=CHECKPOINT GUESS=CHECK\ \Imine - SiH3 transition state\0,2\C\N,1,r1\  
Si,2,r2,1,a1\H,1,r3,2,a2,3,d1,0\H,1,r4,2,a3,3,d2,0\H,3,r5,2,a4,1,d3,0\H,3,r6,2,a5,1,d4,0\H,3,r7,2,a6,1,d5,0\H,3,r  
8,2,a7,1,d6,0\ r1=1.26420036\ r2=2.31491671\ r3=1.08281317\ r4=1.08085071\ r5=1.01075777\ r6=1.47996299\ r



7=1.47718983\r8=1.50149415\|a1=127.05860528\|a2=123.59416914\|a3=118.69360091\|a4=113.4930=95117\|a5=85.86827529\|a6=88.35409727\|a7=155.87771384\|d1=210.32482049\|d2=29.16656039\|d3=-210.2295263\|d4=-35.95389342\|d5=213.09102175\|d6=84.04169687\|Version=x86-Linux-G03RevB.04\|State=2-\|HF=-385.8286304\|S2=0.763192\|S21=0.\|S2A=0.750054\|RMSD=0.000e+00\|RMSF=1.190e-05\|Dipole=-1.1665428,0.3499591,-1.166931\|PG=C01 [X(C1H6N1Si1)]\|@

## Reaction of silyl radical with ethylene: Transition state 10

### BHandHLYP/6-311G\*\*

1\| CHEMISTRY CLUSTER KIRKLAND-KNET14\|FTS\|UBHandHLYP\6-311G(d,p)\|C2H7Si1(2)\|UWILEV\20-Apr-2005\|1\|#BHANDHLYP/6-311G\*\* SCF=TIGHT OPT=(TS,EF,CALCF, Z-MATRIX, MAXCYCLE=100)\| Transition state silyl radical addition to ethene\|0,2\|C\|Si,1,r1\|C,1,r2,2,a1\|H,2,r3,1,a2,3,d1,0\|H,2,r4,1,a3,4,d2,0\|H,2,r5,1,a4,4,d3,0\|H,1,r6,3,a5,2,d4,0\|H,1,r7,3,a6,2,d5,0\|H,3,r8,1,a7,2,d6,0\|H,3,r9,1,a8,2,d7,0\|r1=2.6796\r2=1.3445\r3=1.4848\r4=1.4766\r5=1.4768\r6=1.0763\r7=1.0763\r8=1.0764\r9=1.0764\|a1=99.9583\|a2=132.5892\|a3=97.0166\|a4=97.1001\|a5=121.0537\|a6=121.0505\|a7=121.4685\|a8=121.469\|d1=180.0198\|d2=124.431\|d3=-124.5786\|d4=97.8212\|d5=-97.8023\|d6=88.329\|d7=-88.411\|Version=x86-Linux-G03RevB.04\|State=2-\|HF=-369.7833004\|S2=0.794042\|S2-1=0.\|S2A=0.750218\|RMSD=2.706e-09\|RMSF=4.726e-05\|Dipole=-0.0168435,0.000352,-0.452439\|Polar=55.2235785,0.0050864,45.4724266,-15.4099149,0.0095759,69.7543347\|PG=C01 [X(C2H7Si1)]\|@

## 5-endo Cyclization of silyl radical to alkyne: Transition state 11

### BHandHLYP/6-311G\*\*

1\| CHEMISTRY CLUSTER KIRKLAND-KNET14\|FTS\|UBHandHLYP\6-311G(d,p)\|C3H5O1Si1(2)\|UWILEV\17-May-2005\|1\|#BHANDHLY/6-311G\*\* SCF=VERYTIGHT OPT=(TS,NOEIGENTEST, Z-MATRIX, READFC, MAXCYCLE=100) GEOM=CHECKPOINT GUESS=CHECK\| Transition state 5-endo cyclization with SiH2\|0,2\|C,1.0860338507,-0.4918368019,-0.8710930127\|C,1.4314972805,0.2839539002,0.3246477978\|C,0.9836100405,0.8342662648,1.3101681808\|Si,-1.3004870352,0.1108764691,0.1834738318\|O,-0.3043897582,-0.7357369863,-0.841749883\|H,-1.7784592776,1.3693254969,-0.4334353753\|H,-2.4395988917,-0.7864081768,0.4614885786\|H,1.6086834452,-1.4419770291,-0.8889442459\|H,1.3490799396,0.0574639035,-1.7712418704\|H,0.8953843125,1.3769209499,2.2151605362\|Version=x86-Linux-G03RevB.04\|State=2-\|HF=-481.8616307\|S2=0.786532\|S2-1=0.\|S2A=0.750274\|RMSD=9.747e-09\|RMSF=2.718e-05\|Dipole=0.3479653,0.2787703,0.3141821\|PG=C01 [X(C3H5O1Si1)]\|@
